# Supplementary figures and images for: A transformer-based deep learning framework to predict employee attrition
Source: PeerJ journal article supplement (doi:10.7717/peerj-cs.1570), 2023-09-27

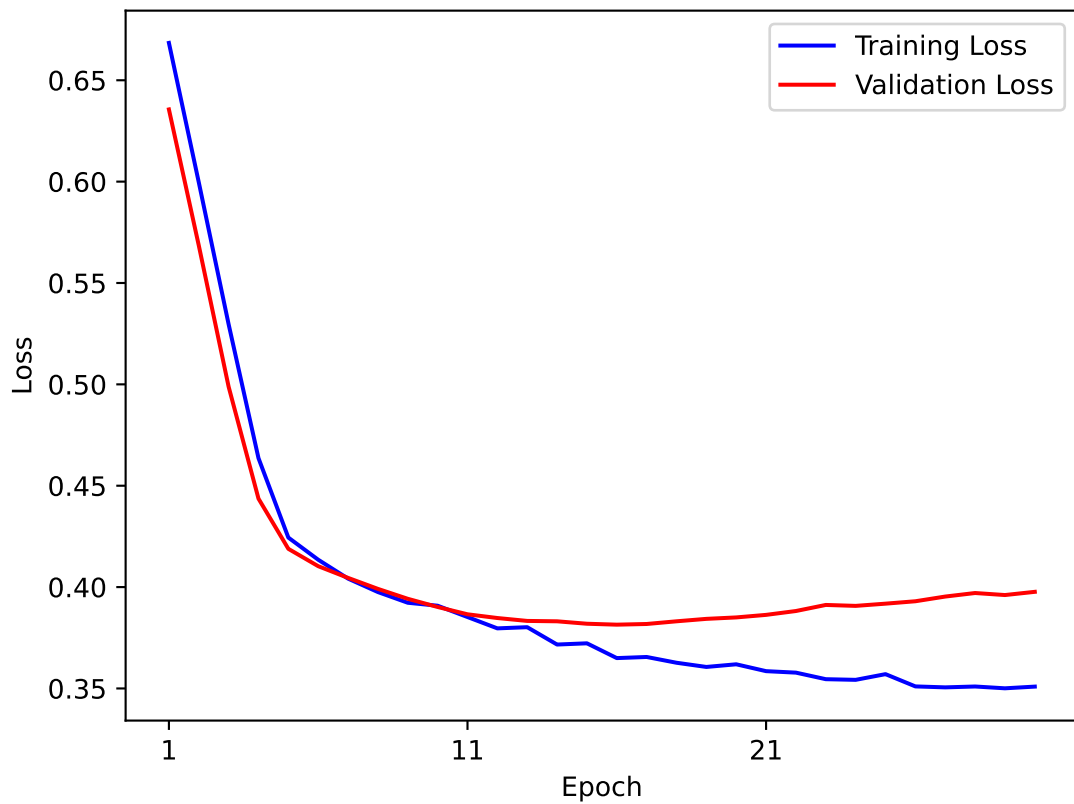

Supplement: code_and_data.zip [file code_and_data.zip]
